# Supplementary material
Source: PubMed Central journal article supplement (PMC8759576)
Supplement: NIHMS1716524-supplement-Supplemental_Material_Tables_S1-S5.pdf [file NIHMS1716524-supplement-Supplemental_Material_Tables_S1-S5.pdf]

**Perkins JM, Kakuhikire B, Baguma C, et al. Overestimation of alcohol consumption norms as a driver of alcohol consumption: a whole-population network study of men across eight villages in rural, southwestern Uganda. *Addiction*. 2021;117(1):68-81.**

**Supplementary Material (Tables S1-S5)**

Table S1. Modified Poisson regression models estimating associations between perceived norms and frequent and heavy alcohol consumption among men in eight villages in rural Uganda -- excluding 39 men who identified as Muslim, Born-again Pentecostal, and Seventh Day Adventist.

|                                                                                   | Frequent alcohol consumption<br>(n=669) |              |         | Heavy alcohol consumption<br>(n=669) |              |         |
|-----------------------------------------------------------------------------------|-----------------------------------------|--------------|---------|--------------------------------------|--------------|---------|
|                                                                                   | aRR                                     | (95% CI)     | p-value | aRR                                  | (95% CI)     | p-value |
| <b>Perceived norm</b>                                                             |                                         |              |         |                                      |              |         |
| Incorrectly thought that most men in own village engage in this behavior          | 3.99                                    | (1.67, 9.57) | 0.002   | 4.65                                 | (2.35, 9.18) | <0.001  |
| Correctly thought that most men did not engage in this behavior                   | REF                                     |              |         | REF                                  |              |         |
| <b>Exposure to alcohol consumption behavior by men in personal network</b>        |                                         |              |         |                                      |              |         |
| At least one male alter reported this alcohol consumption behavior                | 2.31                                    | (1.44, 3.70) | <0.001  | 1.49                                 | (0.87, 2.57) | 0.146   |
| No male alters reported this alcohol consumption behavior                         | REF                                     |              |         | REF                                  |              |         |
| <b>Personal attitudes about intoxication</b>                                      |                                         |              |         |                                      |              |         |
| Thought intoxication was okay                                                     | 3.42                                    | (2.36, 4.96) | <0.001  | 2.12                                 | (1.91, 2.35) | <0.001  |
| Did not think intoxication was okay                                               | REF                                     |              |         | REF                                  |              |         |
| <b>Number of male alters in personal social network</b>                           |                                         |              |         |                                      |              |         |
| Childhood exposure to adult who consumed alcohol excessively or who misused drugs | 1.01                                    | (0.99, 1.04) | 0.354   | 0.99                                 | (0.98, 1.01) | 0.526   |
| Had exposure                                                                      | 1.17                                    | (0.75, 1.82) | 0.493   | 1.29                                 | (0.91, 1.85) | 0.158   |
| Did not have exposure                                                             | REF                                     |              |         | REF                                  |              |         |

|                                               |      |              |        |      |              |        |
|-----------------------------------------------|------|--------------|--------|------|--------------|--------|
| Self-reported HIV serostatus                  |      |              |        |      |              |        |
| HIV serostatus unknown                        | 1.87 | (1.51, 2.32) | <0.001 | 1.57 | (1.39, 1.78) | <0.001 |
| HIV positive                                  | 1.58 | (1.01, 2.47) | 0.044  | 0.93 | (0.59, 1.47) | 0.758  |
| HIV negative                                  | REF  |              |        | REF  |              |        |
| Depression status                             |      |              |        |      |              |        |
| Symptoms indicate probable depression         | 0.98 | (0.50, 1.92) | 0.950  | 1.26 | (0.90, 1.76) | 0.174  |
| Symptoms did not indicate probable depression | REF  |              |        | REF  |              |        |
| Age (in years)                                | 1.01 | (1.00, 1.02) | 0.015  | 1.00 | (1.00, 1.01) | 0.216  |
| Marital status                                |      |              |        |      |              |        |
| Married / cohabiting                          | 0.83 | (0.68, 1.03) | 0.087  | 0.93 | (0.74, 1.18) | 0.544  |
| Divorced/separated/single                     | REF  |              |        | REF  |              |        |
| Education level                               |      |              |        |      |              |        |
| Completed primary education                   | 0.95 | (0.69, 1.30) | 0.755  | 1.08 | (0.76, 1.53) | 0.681  |
| Did not complete primary education            | REF  |              |        | REF  |              |        |
| Household asset wealth                        |      |              |        |      |              |        |
| 1st quintile (poorest)                        | 2.31 | (1.38, 3.89) | 0.002  | 1.54 | (1.20, 1.98) | 0.001  |
| 2nd quintile                                  | 1.49 | (0.97, 2.28) | 0.067  | 1.40 | (1.00, 1.97) | 0.051  |
| 3rd quintile                                  | 1.33 | (0.94, 1.88) | 0.112  | 1.05 | (0.77, 1.43) | 0.757  |
| 4th quintile                                  | 1.90 | (1.02, 3.51) | 0.042  | 1.41 | (1.03, 1.92) | 0.032  |
| 5th quintile (least poor)                     | REF  |              |        | REF  |              |        |
| Religion                                      |      |              |        |      |              |        |
| Protestant                                    | REF  |              |        | REF  |              |        |
| Catholic                                      | 1.10 | (0.63, 1.92) | 0.742  | 1.24 | (0.99, 1.54) | 0.062  |
| Other religion                                | 0.00 | (0.00, 0.00) | <0.001 | 0.00 | (0.00, 0.00) | <0.001 |

Notes: Each column represents one multivariable Poisson regression model fitted to the data. aRR = adjusted relative risk ratio. CI = confidence interval. REF = reference category for dichotomous and categorical variables. Frequent alcohol consumption was defined as  $\geq 4$  times per week. Heavy alcohol consumption was defined as reporting consumption of  $\geq 6$  drinks on one occasion at least once in the past 12 months, spending excessive money on alcohol in the past 30 days, or being intoxicated 3 or more times in the past 30 days. In these analyses, there are 3 participants in the “Other” religion category.

Table S2. Modified Poisson regression models estimating associations between perceived norms and frequent and heavy alcohol consumption among men in eight villages in rural Uganda -- excluding men who were not married or cohabiting.

|                                                                                   | Frequent alcohol consumption<br>(n=455) |              |         | Heavy alcohol consumption<br>(n=455) |               |         |
|-----------------------------------------------------------------------------------|-----------------------------------------|--------------|---------|--------------------------------------|---------------|---------|
|                                                                                   | aRR                                     | (95% CI)     | p-value | aRR                                  | (95% CI)      | p-value |
| <b>Perceived norm</b>                                                             |                                         |              |         |                                      |               |         |
| Incorrectly thought that most men in own village engage in this behavior          | 4.70                                    | (2.38, 9.26) | <0.001  | 8.48                                 | (3.26, 22.03) | <0.001  |
| Correctly thought that most men did not engage in this behavior                   | REF                                     |              |         | REF                                  |               |         |
| <b>Exposure to alcohol consumption behavior by men in personal network</b>        |                                         |              |         |                                      |               |         |
| At least one male alter reported this alcohol consumption behavior                | 2.28                                    | (1.16, 4.47) | 0.017   | 2.12                                 | (0.98, 4.60)  | 0.057   |
| No male alters reported this alcohol consumption behavior                         | REF                                     |              |         | REF                                  |               |         |
| <b>Personal attitudes about intoxication</b>                                      |                                         |              |         |                                      |               |         |
| Thought intoxication was okay                                                     | 3.38                                    | (2.32, 4.92) | <0.001  | 2.24                                 | (1.86, 2.69)  | <0.001  |
| Did not think intoxication was okay                                               | REF                                     |              |         | REF                                  |               |         |
| <b>Participant reported partner alcohol consumption</b>                           |                                         |              |         |                                      |               |         |
| Participant reported spouse/partner to have consumed alcohol in past 12 months    | 1.17                                    | (0.80, 1.70) | 0.411   | 1.32                                 | (0.92, 1.89)  | 0.138   |
| Participant did not report spouse/partner alcohol consumption in past 12 months   | REF                                     |              |         | REF                                  |               |         |
| <b>Number of male alters in personal social network</b>                           |                                         |              |         |                                      |               |         |
| Childhood exposure to adult who consumed alcohol excessively or who misused drugs | 1.05                                    | (1.01, 1.08) | 0.010   | 1.00                                 | (0.98, 1.02)  | 0.920   |
| Had exposure                                                                      | 1.21                                    | (0.93, 1.59) | 0.160   | 1.06                                 | (0.82, 1.38)  | 0.653   |
| Did not have exposure                                                             | REF                                     |              |         | REF                                  |               |         |
| <b>Self-reported HIV serostatus</b>                                               |                                         |              |         |                                      |               |         |

|                                               |      |              |        |      |              |        |
|-----------------------------------------------|------|--------------|--------|------|--------------|--------|
| HIV serostatus unknown                        | 2.03 | (0.79, 5.24) | 0.144  | 1.98 | (1.51, 2.59) | <0.001 |
| HIV positive                                  | 1.17 | (0.52, 2.65) | 0.707  | 0.75 | (0.35, 1.62) | 0.462  |
| HIV negative                                  | REF  |              |        | REF  |              |        |
| Depression status                             |      |              |        |      |              |        |
| Symptoms indicate probable depression         | 0.86 | (0.31, 2.37) | 0.777  | 1.16 | (0.82, 1.64) | 0.390  |
| Symptoms did not indicate probable depression | REF  |              |        | REF  |              |        |
| Age (in years)                                | 1.01 | (0.99, 1.02) | 0.478  | 1.00 | (0.99, 1.01) | 0.803  |
| Education level                               | 1.06 | (0.52, 2.14) | 0.876  | 1.25 | (0.87, 1.80) | 0.236  |
| Completed primary education                   |      |              |        |      |              |        |
| Did not complete primary education            |      |              |        |      |              |        |
| Household asset wealth                        |      |              |        |      |              |        |
| 1st quintile (poorest)                        | 2.66 | (1.53, 4.63) | 0.001  | 1.60 | (0.95, 2.69) | 0.075  |
| 2nd quintile                                  | 1.82 | (0.91, 3.67) | 0.092  | 1.47 | (1.17, 1.85) | 0.001  |
| 3rd quintile                                  | 2.07 | (1.28, 3.34) | 0.003  | 1.17 | (0.91, 1.51) | 0.224  |
| 4th quintile                                  | 3.26 | (2.31, 4.59) | <0.001 | 1.49 | (1.28, 1.74) | <0.001 |
| 5th quintile (least poor)                     | REF  |              |        | REF  |              |        |

Notes: Each column represents one multivariable Poisson regression model fitted to the data. aRR = adjusted relative risk ratio. CI = confidence interval. REF = reference category for dichotomous and categorical variables. Frequent alcohol consumption was defined as  $\geq 4$  times per week. Heavy alcohol consumption was defined as reporting consumption of  $\geq 6$  drinks on one occasion at least once in the past 12 months, spending excessive money on alcohol in the past 30 days, or being intoxicated 3 or more times in the past 30 days.

Table S3. Modified Poisson regression models estimating associations between perceived norms and frequent alcohol consumption among men in eight villages in rural Uganda -- using an alternative threshold for defining frequent alcohol consumption ( $\geq 2$  days per week).

|                                                                                   | Frequent alcohol consumption<br>(n=708) |              |         |
|-----------------------------------------------------------------------------------|-----------------------------------------|--------------|---------|
|                                                                                   | aRR                                     | (95% CI)     | p-value |
| Perceived norm                                                                    |                                         |              |         |
| Incorrectly thought that most men in own village engage in this behavior          | 4.12                                    | (1.82, 9.29) | 0.001   |
| Correctly thought that most men did not engage in this behavior                   | REF                                     |              |         |
| Exposure to consuming alcohol $\geq 2$ times per week by men in personal network  |                                         |              |         |
| At least one male alter reported consuming alcohol $\geq 2$ times per week        | 3.04                                    | (1.29, 7.13) | 0.011   |
| No male alters reported consuming alcohol $\geq 2$ times per week                 | REF                                     |              |         |
| Personal attitude about intoxication                                              |                                         |              |         |
| Thought intoxication was okay                                                     | 3.73                                    | (2.59, 5.37) | <0.001  |
| Did not think intoxication was okay                                               | REF                                     |              |         |
| Number of male alters in personal social network                                  | 1.03                                    | (1.01, 1.04) | <0.001  |
| Childhood exposure to adult who consumed alcohol excessively or who misused drugs |                                         |              |         |
| Had exposure                                                                      | 1.24                                    | (0.87, 1.78) | 0.237   |
| Did not have exposure                                                             | REF                                     |              |         |
| Self-reported HIV serostatus                                                      |                                         |              |         |
| HIV serostatus unknown                                                            | 1.85                                    | (1.36, 2.51) | <0.001  |
| HIV positive                                                                      | 1.47                                    | (1.01, 2.15) | 0.047   |
| HIV negative                                                                      | REF                                     |              |         |
| Symptoms indicate probable depression                                             | 0.96                                    | (0.50, 1.83) | 0.898   |
| Age (in years)                                                                    | 1.01                                    | (1.00, 1.02) | 0.036   |
| Marital status                                                                    |                                         |              |         |
| Married / cohabiting                                                              | 0.85                                    | (0.69, 1.03) | 0.104   |
| Divorced/separated/single                                                         | REF                                     |              |         |

|                                    |      |              |        |
|------------------------------------|------|--------------|--------|
| Education level                    |      |              |        |
| Completed primary education        | 0.92 | (0.61, 1.39) | 0.703  |
| Did not complete primary education | REF  |              |        |
| Household asset wealth             |      |              |        |
| 1st quintile (poorest)             | 2.23 | (1.45, 3.43) | <0.001 |
| 2nd quintile                       | 1.57 | (1.06, 2.31) | 0.024  |
| 3rd quintile                       | 1.46 | (1.01, 2.10) | 0.045  |
| 4th quintile                       | 2.03 | (1.14, 3.61) | 0.016  |
| 5th quintile (least poor)          | REF  |              |        |

---

Notes: Each column represents one multivariable Poisson regression model fitted to the data. aRR = adjusted relative risk ratio. CI = confidence interval. REF = Reference category for dichotomous and categorical variables.

Table S4. Modified Poisson regression models estimating associations between perceived norms and frequent and heavy alcohol consumption among men in eight villages in rural Uganda -- using an alternative measure of exposure to alcohol consumption by men in one's personal network.

|                                                                                               | Frequent alcohol consumption<br>(n=708) |              |         | Heavy alcohol consumption<br>(n=707) |              |         |
|-----------------------------------------------------------------------------------------------|-----------------------------------------|--------------|---------|--------------------------------------|--------------|---------|
|                                                                                               | aRR                                     | (95% CI)     | p-value | aRR                                  | (95% CI)     | p-value |
| Perceived norm                                                                                |                                         |              |         |                                      |              |         |
| Incorrectly thought that most men in own village engage in this behavior                      | 3.71                                    | (1.56, 8.83) | 0.003   | 4.53                                 | (2.22, 9.24) | <0.001  |
| Correctly thought that most men did not engage in this behavior                               | REF                                     |              |         | REF                                  |              |         |
| Number of male alters in personal social network who report this alcohol consumption behavior | 1.39                                    | (1.26, 1.52) | <0.001  | 1.25                                 | (1.11, 1.42) | <0.001  |
| Personal attitudes about intoxication                                                         |                                         |              |         |                                      |              |         |
| Thought intoxication was okay                                                                 | 3.53                                    | (2.46, 5.08) | <0.001  | 2.12                                 | (1.91, 2.35) | <0.001  |
| Did not think intoxication was okay                                                           | REF                                     |              |         | REF                                  |              |         |
| Number of male alters in personal social network                                              | 0.99                                    | (0.96, 1.03) | 0.649   | 0.94                                 | (0.91, 0.98) | 0.002   |
| Childhood exposure to adult who consumed alcohol excessively or who misused drugs             |                                         |              |         |                                      |              |         |
| Had exposure                                                                                  | 1.16                                    | (0.80, 1.69) | 0.425   | 1.31                                 | (0.92, 1.84) | 0.130   |
| Did not have exposure                                                                         | REF                                     |              |         | REF                                  |              |         |
| Self-reported HIV serostatus                                                                  |                                         |              |         |                                      |              |         |
| HIV serostatus unknown                                                                        | 1.68                                    | (1.21, 2.34) | 0.002   | 1.64                                 | (1.42, 1.89) | <0.001  |
| HIV positive                                                                                  | 1.38                                    | (0.80, 2.37) | 0.243   | 0.82                                 | (0.49, 1.38) | 0.456   |
| HIV negative                                                                                  | REF                                     |              |         | REF                                  |              |         |
| Depression status                                                                             |                                         |              |         |                                      |              |         |
| Symptoms indicate probable depression                                                         | 1.04                                    | (0.54, 2.01) | 0.908   | 1.26                                 | (0.84, 1.89) | 0.270   |
| Symptoms did not indicate probable depression                                                 | REF                                     |              |         | REF                                  |              |         |
| Age (in years)                                                                                | 1.01                                    | (1.00, 1.02) | 0.070   | 1.00                                 | (1.00, 1.01) | 0.360   |
| Marital status                                                                                |                                         |              |         |                                      |              |         |

|                                    |      |              |       |      |              |       |
|------------------------------------|------|--------------|-------|------|--------------|-------|
| Married / cohabiting               | 0.92 | (0.76, 1.11) | 0.375 | 0.95 | (0.74, 1.23) | 0.713 |
| Divorced/separated/single          | REF  |              |       | REF  |              |       |
| Education level                    |      |              |       |      |              |       |
| Completed primary education        | 0.94 | (0.61, 1.47) | 0.799 | 1.08 | (0.74, 1.57) | 0.694 |
| Did not complete primary education | REF  |              |       | REF  |              |       |
| Household asset wealth             |      |              |       |      |              |       |
| 1st quintile (poorest)             | 2.24 | (1.29, 3.86) | 0.004 | 1.42 | (1.10, 1.84) | 0.008 |
| 2nd quintile                       | 1.55 | (1.03, 2.33) | 0.035 | 1.38 | (0.98, 1.95) | 0.065 |
| 3rd quintile                       | 1.38 | (0.95, 2.01) | 0.091 | 0.97 | (0.72, 1.31) | 0.848 |
| 4th quintile                       | 1.78 | (0.98, 3.21) | 0.057 | 1.24 | (0.91, 1.69) | 0.176 |
| 5th quintile (least poor)          | REF  |              |       | REF  |              |       |

Notes: Each column represents one multivariable Poisson regression model fitted to the data. aRR = adjusted relative risk ratio. CI = confidence interval. REF = reference category for dichotomous and categorical variables. Frequent alcohol consumption was defined as  $\geq 4$  times per week. Heavy alcohol consumption was defined as reporting consumption of  $\geq 6$  drinks on one occasion at least once in the past 12 months, spending excessive money on alcohol in the past 30 days, or being intoxicated 3 or more times in the past 30 days.



Table S5. Linear probability model estimating associations between perceived norms and frequent and heavy alcohol consumption among men in rural Uganda -- adjusting for social network autocorrelation.

|                                                                                   | Frequent alcohol consumption<br>(n=708) |                |         | Heavy alcohol consumption<br>(n=707) |                |         |
|-----------------------------------------------------------------------------------|-----------------------------------------|----------------|---------|--------------------------------------|----------------|---------|
|                                                                                   | $\beta$                                 | Standard error | p-value | $\beta$                              | Standard error | p-value |
| Perceived norm                                                                    |                                         |                |         |                                      |                |         |
| Incorrectly thought that most men in own village engage in this behavior          | 0.08                                    | 0.02           | 0.001   | 0.19                                 | 0.03           | <0.001  |
| Correctly thought that most men did not engage in this behavior                   | REF                                     |                |         | REF                                  |                |         |
| Exposure to alcohol consumption behavior by men in personal network               |                                         |                |         |                                      |                |         |
| At least one male alter reported this alcohol consumption behavior                | 0.14                                    | 0.06           | 0.015   | 0.01                                 | 0.04           | 0.796   |
| No male alters reported this alcohol consumption behavior                         | REF                                     |                |         | REF                                  |                |         |
| Personal attitudes about intoxication                                             |                                         |                |         |                                      |                |         |
| Thought intoxication was okay                                                     | 0.16                                    | 0.02           | <0.001  | 0.20                                 | 0.03           | <0.001  |
| Did not think intoxication was okay                                               | REF                                     |                |         | REF                                  |                |         |
| Number of male alters in personal social network                                  |                                         |                |         |                                      |                |         |
| Childhood exposure to adult who consumed alcohol excessively or who misused drugs | 0.00                                    | 0.00           | 0.635   | 0.00                                 | 0.00           | 0.416   |
| Had exposure                                                                      | 0.01                                    | 0.02           | 0.628   | 0.08                                 | 0.03           | 0.010   |
| Did not have exposure                                                             | REF                                     |                |         | REF                                  |                |         |
| Self-reported HIV serostatus                                                      |                                         |                |         |                                      |                |         |
| HIV serostatus unknown                                                            | 0.07                                    | 0.04           | 0.060   | 0.15                                 | 0.05           | 0.004   |
| HIV positive                                                                      | 0.07                                    | 0.04           | 0.089   | -0.05                                | 0.06           | 0.365   |
| HIV negative                                                                      | REF                                     |                |         | REF                                  |                |         |
| Depression status                                                                 |                                         |                |         |                                      |                |         |

|                                               |       |      |       |       |      |       |
|-----------------------------------------------|-------|------|-------|-------|------|-------|
| Symptoms indicate probable depression         | -0.01 | 0.03 | 0.702 | 0.07  | 0.05 | 0.123 |
| Symptoms did not indicate probable depression | REF   |      |       | REF   |      |       |
| Age (in years)                                | 0.00  | 0.00 | 0.291 | 0.00  | 0.00 | 0.750 |
| Marital status                                |       |      |       |       |      |       |
| Married / cohabiting                          | -0.03 | 0.03 | 0.273 | -0.02 | 0.04 | 0.606 |
| Divorced/separated/single                     | REF   |      |       | REF   |      |       |
| Education level                               |       |      |       |       |      |       |
| Completed primary education                   | -0.04 | 0.02 | 0.048 | -0.01 | 0.03 | 0.712 |
| Did not complete primary education            | REF   |      |       | REF   |      |       |
| Household asset wealth                        |       |      |       |       |      |       |
| 1st quintile (poorest)                        | 0.05  | 0.04 | 0.230 | 0.08  | 0.05 | 0.114 |
| 2nd quintile                                  | -0.01 | 0.03 | 0.770 | 0.06  | 0.05 | 0.206 |
| 3rd quintile                                  | -0.01 | 0.03 | 0.814 | -0.01 | 0.05 | 0.849 |
| 4th quintile                                  | 0.02  | 0.03 | 0.470 | 0.04  | 0.04 | 0.364 |
| 5th quintile (least poor)                     | REF   |      |       | REF   |      |       |
| Village                                       |       |      |       |       |      |       |
| 1                                             | REF   |      |       | REF   |      |       |
| 2                                             | -0.07 | 0.04 | 0.059 | -0.09 | 0.06 | 0.119 |
| 3                                             | 0.03  | 0.04 | 0.506 | -0.07 | 0.06 | 0.298 |
| 4                                             | -0.07 | 0.04 | 0.067 | -0.11 | 0.06 | 0.060 |
| 5                                             | -0.08 | 0.05 | 0.095 | -0.14 | 0.07 | 0.038 |
| 6                                             | -0.09 | 0.03 | 0.011 | -0.15 | 0.06 | 0.012 |
| 7                                             | -0.11 | 0.04 | 0.016 | -0.02 | 0.07 | 0.825 |
| 8                                             | -0.09 | 0.04 | 0.013 | -0.19 | 0.06 | 0.001 |

Notes: Each column represents one linear probability model fitted to the data. REF = reference category for dichotomous and categorical variables. Frequent alcohol consumption was defined as  $\geq 4$  times per week. Heavy alcohol consumption was defined as reporting consumption of  $\geq 6$  drinks on one occasion at least once in the past 12 months, spending excessive money on alcohol in the past 30 days, or being intoxicated 3 or more times in the past 30 days.
